# Supplementary material for: Immunoglobulin G subclass and antibody avidity responses in Malian children immunized with Plasmodium falciparum apical membrane antigen 1 vaccine candidate FMP2.1/AS02A
Source: Malar J. 2019 Jan 18;18:13. doi: 10.1186/s12936-019-2637-x (PMC6339315; doi:10.1186/s12936-019-2637-x)
Supplement: Supplementary file 1 — Additional file 1. AMA1 IgG subclass titers, total IgG titers, and cytophilic ratios for AMA1 vaccine and control groups. [file 12936_2019_2637_MOESM1_ESM.xlsx]

## Sheet: Additional File 1
Additional File 1. AMA1 IgG subclass titers for AMA1 vaccine and control groups
	AMA1 vaccine group (n=85)	Control group (n=29)
IgG titer	geometric mean titer (95% CI)	geometric mean titer (95% CI)	Pa
IgG1 day 0	323.5	560.5	0.441414
	(173.1, 604.8)	(199.6, 1,574.1)
IgG1 day 90	138,098.8	749.9	<0.001
	(112,139.6, 170,075.9)	(260.3, 2,160.4)
IgG1 day 240	37,494.8	1,070.4	0.0494443
	(24,518.9, 57,336.9)	(353.8, 3,238.0)
IgG2 day 0	37.9	34.7	0.362107
	(26.9, 53.4)	(20.8, 57.8)
IgG2 day 90	4,704.3	46.4	<0.001
	(3,555.6, 6,224.0)	(24.0, 89.8)
IgG2 day 240	1,688.8	55.1	<0.001
	(1,247.5, 2,286.3)	(28.7, 105.6)
IgG3 day 0	20.6	20.6	0.117996
	(16.8, 25.3)	(12.2, 34.6)
IgG3 day 90	3,612.5	31.4	<0.001
	(2,512.6, 5,193.8)	(16.0, 61.7)
IgG3 day 240	424.0	20.1	0.0322415
	(287.5, 625.2)	(12.3, 32.8)
IgG4 day 0	28.7	22.6	0.341032
	(21.3, 38.7)	(16.9, 30.3)
IgG4 day 90	2,679.2	22.0	0.324689
	(1,736.2, 4,134.3)	(13.8, 35.2)
IgG4 day 240	1,608.1	24.3	0.00138965
	(1,133.0, 2,282.5)	(16.3, 36.2)
total IgG day 0	431.3	751.013	0.47
	(245.8, 756.9)	(318.1, 1,773.0)
total IgG day 90	198240	954.946	<0.001
	(167,661.1, 234,403.7)	(334.752, 2,724.2)
total IgG day 240	66695.3	1291.12	0.025
	(52,617.3, 84,541.7)	(473.3, 3,522.0)
cytophilic ratiob day 0	5.4	10.3	0.131544
	(3.7, 7.7)	(5.3, 20.1)
cytophilic ratio day 90	13.3	11.6	0.0842358
	(10.3, 17.2)	(6.2, 21.7)
cytophilic ratio day 240	9.6	13.4	0.019993
	(7.0, 13.2)	(6.6, 27.1)
Bold values denote significant results with alpha = 0.05.
aP value for two-tailed, two-sample students t-test.
bCytophilic ratio is the sum of IgG1 and IgG2 titers divided by the sum of the IgG3 and IgG4 titers.
